# Supplementary material for: Cardiovascular disease risk prediction using automated machine learning: A prospective study of 423,604 UK Biobank participants
Source: PubMed Central journal article supplement (PMC6519796; doi:10.1371/journal.pone.0213653), 2019-05-15
Supplement: pone.0213653.s005.pdf [file pone.0213653.s005.pdf]

|                          |                      |                      |                      |
|--------------------------|----------------------|----------------------|----------------------|
| Body Mass Index          | Height               | Weight               | Pulse rate           |
| Systolic blood pressure  | Waist circumference  | Hip circumference    | T-score              |
| Diastolic blood pressure | Body fat percentage  | Leg fat-free mass R  | Arm predicted mass R |
| Ankle spacing width      | Impedance of leg R   | Leg predicted mass R | Arm fat percentage L |
| Hand grip strength L     | Impedance of leg L   | Leg fat mass L       | Arm fat mass L       |
| Hand grip strength R     | Impedance of arm R   | Leg fat-free mass L  | Arm fat-free mass L  |
| Whole body fat-free mass | Impedance of arm L   | Leg predicted mass L | Arm predicted mass L |
| Whole body fat mass      | Leg fat percentage R | Arm fat percentage R | Trunk fat percentage |
| Whole body water mass    | Leg fat percentage L | Arm fat mass R       | Trunk fat mass       |
| Basal metabolic rate     | Leg fat mass R       | Arm fat-free mass R  | Trunk predicted mass |

|                                |                                          |
|--------------------------------|------------------------------------------|
| OCT measured (right)           | Speed of sound through heel              |
| OCT measured (left)            | Heel quantitative ultrasound index (QUI) |
| Glasses worn/required (right)  | Heel bone mineral density (BMD)          |
| Glasses worn/required (left)   | Contra-indications for spirometry        |
| Birth weight                   | Heel Broadband ultrasound attenuation    |
| Foot measured for bone density | Fractured heel                           |

|      |     |     |
|------|-----|-----|
| FEV1 | FVC | PEF |
|------|-----|-----|

**S5 Table** List of physical measures collected for participants.
