# Supplementary material for: Cardiovascular disease risk prediction using automated machine learning: A prospective study of 423,604 UK Biobank participants
Source: PubMed Central journal article supplement (PMC6519796; doi:10.1371/journal.pone.0213653), 2019-05-15
Supplement: pone.0213653.s006.pdf [file pone.0213653.s006.pdf]

|                                                             |                                                                |
|-------------------------------------------------------------|----------------------------------------------------------------|
| Mood swings                                                 | Miserableness                                                  |
| Irritability                                                | Sensitivity/hurt feelings                                      |
| Fed-up feelings                                             | Nervous feelings                                               |
| Worrier/anxious feelings                                    | Tense/highly strung                                            |
| Worry too long after embarrassment                          | Suffer from nerves                                             |
| Loneliness and Isolation                                    | Guilty feelings                                                |
| Risk taking                                                 | Frequency of depressed mood in last 2 weeks                    |
| Freq. of unenthusiasm in last 2 weeks                       | Freq. of tenseness/restlessness in last 2 weeks                |
| Seen doctor (GP) for nerves, anxiety, tension or depression | Frequency of tiredness/lethargy in last 2 weeks                |
| Able to confide                                             | Seen a psychiatrist for nerves, anxiety, tension or depression |

**S6 Table** List of variables on the participants' psychosocial status.
