# Supplementary material for: Cardiovascular disease risk prediction using automated machine learning: A prospective study of 423,604 UK Biobank participants
Source: PLOS journal article supplement (doi:10.1371/journal.pone.0213653), 2019-05-15
Supplement: S4 (10.1371/journal.pone.0213653.s004) [file journal.pone.0213653.s004]

|                                          |                                                    |                                         |
|------------------------------------------|----------------------------------------------------|-----------------------------------------|
| Cooked vegetable intake                  | Salad and raw vegetable intake                     | Fresh fruit intake                      |
| Dried fruit intake                       | Oily fish intake                                   | Non-oily fish intake                    |
| Processed meat intake                    | Poultry intake                                     | Beef intake                             |
| Lamb intake                              | Pork intake                                        | Cheese intake                           |
| Spreadable butter                        | Bread intake                                       | Cereal intake                           |
| Salt added to food                       | Tea intake                                         | Coffee intake                           |
| Water intake                             | Milk type used                                     | Variation in diet                       |
| Alcohol intake                           | Average weekly red wine intake                     | Average weekly spirits intake           |
| Average weekly beer plus<br>cider intake | Average weekly champagne plus<br>white wine intake | Average weekly fortified wine<br>intake |
| Alcohol taken with meals                 | Soya Milk                                          | Alcohol intake vs 10 years ago          |
| Full cream milk                          | Semi-skimmed milk                                  | White bread                             |
| Skimmed milk                             | Wholegrain bread                                   | Brown bread                             |
| Decaffeinated coffee                     | Instant coffee                                     | Ground coffee                           |

**S4 Table** List of variables on the participants' dietary and nutritional information.
