# Supplementary material for: Cardiovascular disease risk prediction using automated machine learning: A prospective study of 423,604 UK Biobank participants
Source: PLOS journal article supplement (doi:10.1371/journal.pone.0213653), 2019-05-15
Supplement: S7 (10.1371/journal.pone.0213653.s007) [file journal.pone.0213653.s007]

**S7 Table** List of variables on the participants' physical activity.

|                               |                                     |                |
|-------------------------------|-------------------------------------|----------------|
| Sleep duration                | Morning/evening person (chronotype) | Snoring        |
| Getting up in morning         | Sleeplessness / insomnia            | Nap during day |
| Daytime sleeping (narcolepsy) |                                     |                |

**(a)** List of variables on the participants' sleeping patterns.

|                       |                             |                       |
|-----------------------|-----------------------------|-----------------------|
| Duration of Walks     | Slow pace walking           | Job Involves Walking  |
| Number of Days Walked | Brisk pace walking          | Distance to Workplace |
| Unable to walk        | Steady average pace walking |                       |

**(b)** List of variables on the participants' walking patterns.

|                                         |                               |                            |
|-----------------------------------------|-------------------------------|----------------------------|
| Days/Week of Moderate Physical Activity | Duration of Vigorous Activity | Frequency of Travelling    |
| Days/Week of Vigorous Physical Activity | Duration of Moderate Activity | Job Involves Physical Work |

**(c)** List of variables on the participants' work and activity patterns.

|                               |                        |
|-------------------------------|------------------------|
| Frequency of strenuous sports | Duration of light DIY  |
| Duration of strenuous sports  | Frequency of light DIY |

**(d)** List of variables on the participants' sports and do-it-yourself work practices.

|                                              |                            |
|----------------------------------------------|----------------------------|
| Maximum workload during fitness test         | Target heart rate achieved |
| Maximum heart rate during fitness test       | Duration of fitness test   |
| Able to walk or cycle unaided for 10 minutes |                            |

**(e)** List of variables extracted from the fitness test conducted for participants at assessment centers.
